# Supplementary material
Source: publisher figshare collection journal article supplement (https://tandf.figshare.com/articles/dataset/_/21829529)
Supplement: Supplementary file 1 [file 1]

## **Correlatos biológicos del trastorno de estrés postraumático complejo - el estado de las investigaciones y tendencias para el futuro**

Zoya Marinova, Andreas Maercker

El trastorno de estrés postraumático complejo (TEPT complejo) presenta características clínicas de TEPT completo o parcial (reexperimentar el evento traumático, evitar recordatorios del evento y un estado de hiperactivación) y síntomas de tres clusters adicionales (problemas de regulación emocional, autoconcepto negativo y problemas en relaciones interpersonales). El TEPT complejo se propone como nueva entidad diagnóstica en el CIE-11 y normalmente tiene lugar después de un trauma complejo y prolongado. En este artículo analizamos brevemente los conocimientos actuales sobre estos correlatos biológicos del TEPT complejo y los comparamos con los hallazgos relevantes en TEPT. Estudios recientes apoyan la validez del TEPT complejo como entidad diagnóstica independiente, sin embargo, los datos relacionados con las bases biológicas del trastorno son aún muy limitados en este momento. Son necesarios más estudios que se enfoquen en los correlatos biológicos del TEPT complejo y en replicar los resultados iniciales, incluyendo estudios de neuroimagen, neurobioquímicos, genéticos y epigénéticos. La identificación de las estructuras biológicas que han sido alteradas en el TEPT complejo puede ser fundamental para llegar a entender la fisiopatología y optimizar las estrategias de tratamiento.

**Keywords:** Trastorno de estrés postraumático complejo, trastorno de estrés postraumático, correlato biológico, trauma complejo, fisiopatología.

**Name of translator:** Miriam Ramos Morrison

**Citation:** European Journal of Psychotraumatology 2015, 6: 25913 - <http://dx.doi.org/10.3402/ejpt.v6.25913>
