# Supplementary material
Source: publisher figshare collection journal article supplement (https://tandf.figshare.com/articles/dataset/_/21829529)
Supplement: Supplementary file 2 [file 1]

Биологические корреляты комплексного посттравматического стрессового расстройства – текущее состояние исследований и перспективы

Zoya Marinova, Andreas Maercker

#### Аннотация

Комплексное посттравматическое стрессовое расстройство (комплексное ПТСР) предлагается в МКБ-11 в качестве нового диагностического объекта. Оно обладает клиническими симптомами полного или частичного посттравматического стрессового расстройства (повторное переживание травматического события, избегание напоминания о событии и состояние чрезмерного возбуждения) вместе с симптомами от трех дополнительных кластеров (проблемы в эмоциональной регуляции, в межличностных отношениях и негативная Я-концепция). Как правило, комплексное ПТСР возникает после длительной и сложной травмы. В статье мы кратко рассматриваем нынешние представления о биологических коррелятах комплексного ПТСР и сравниваем их с релевантными данными, полученными в исследовании ПТСР. Последние исследования подтверждают обоснованность рассмотрения комплексного ПТСР в виде отдельного диагностического объекта, однако, данные о биологических основах этого расстройства все еще очень ограничены. Необходимы дальнейшие исследования биологических коррелятов комплексного ПТСР и повторная проверка первоначальных выводов, в том числе нейровизуализация, нейробиохимические, генетические и эпигенетические исследования. Идентификация измененных биологических путей в комплексном ПТСР может иметь решающее значение для более глубокого понимания патофизиологии и оптимизации стратегии лечения.

Ключевые слова: комплексное посттравматическое стрессовое расстройство; посттравматическое стрессовое расстройство; биологический коррелят; комплексная травма; патофизиология

Name of translator: Shcherbak Marina

**Citation:** European Journal of Psychotraumatology 2015, 6: 25913 - <http://dx.doi.org/10.3402/ejpt.v6.25913>
