# Supplementary material
Source: publisher figshare collection journal article supplement (https://tandf.figshare.com/articles/dataset/_/21829529)
Supplement: Supplementary file 3 [file 1]

## **Karmaşık travma sonrası stres bozukluğunun biyolojik bağintıları: gelecek yönlendirmelerin ve araştırmaların durumu**

Zoya Marinova, Andreas Maercker

### **Özet**

Karmaşık travma sonrası stres bozukluğu (karmaşık TSSB) TSSB'nin tüm ya da kısmi klinik özelliklerinin (travmatik olayı tekrar deneyimleme, olayı hatırlatan şeylerden kaçınma, ve aşırı uyarılma hali) yanında üç ayrı gruptan belirtiler (duygu düzenlemede problemler, olumsuz kendilik algısı, ve kişilerarası ilişkilerde problemler) ile birlikte görülür. Karmaşık TSSB, ICD-11 içinde yeni bir tanısal öge olarak önerilmiş ve uzun ve tipik olarak karmaşık travmadan sonra meydana gelmektedir. Burada karmaşık travmanın biyolojik bağintıları ile ilgili olarak güncel bilgileri kısaca gözden geçirilmiş ve TSSB alanında alakalı bulgularla karşılaştırılmıştır. Geçmiş çalışmalar karmaşık TSSB'nin ayrı bir tanısal öge olarak geçerliğini destekleyici bulgular sağlarken, bozukluğun biyolojik temelleriyle ilgili veriler şu an için halen oldukça kısıtlıdır. Karmaşık travmanın biyolojik bağintılarına odaklanan ve ilk bulgularını tekrarlayan nörogörüntüleme, nörobiyokimyasal, genetik ve epigenetik incelemeler dahil olmak üzere daha ileri çalışmalara ihtiyaç duyulamaktadır. Karmaşık TSSB'de değişmiş olan biyolojik yolların tanımlanması patofizyolojiyi daha fazla anlamak ve tedavi stratejilerini en iyi hale getirmek için önemli olabilir.

**Anahtar Kelimeler:** karmaşık travma sonrası stres bozukluğu; travma sonrası stres bozukluğu; biyolojik bağıntı; karmaşık travma; patofizyoloji

Name of translator: Seray Akça

**Citation:** European Journal of Psychotraumatology 2015, 6: 25913 - <http://dx.doi.org/10.3402/ejpt.v6.25913>
